# Supplementary material for: Long-term effects of ruxolitinib versus best available therapy on bone marrow fibrosis in patients with myelofibrosis
Source: Springer Nature journal article supplement (doi:10.1186/s13045-018-0585-5), 2018-03-15

A. 24 Months

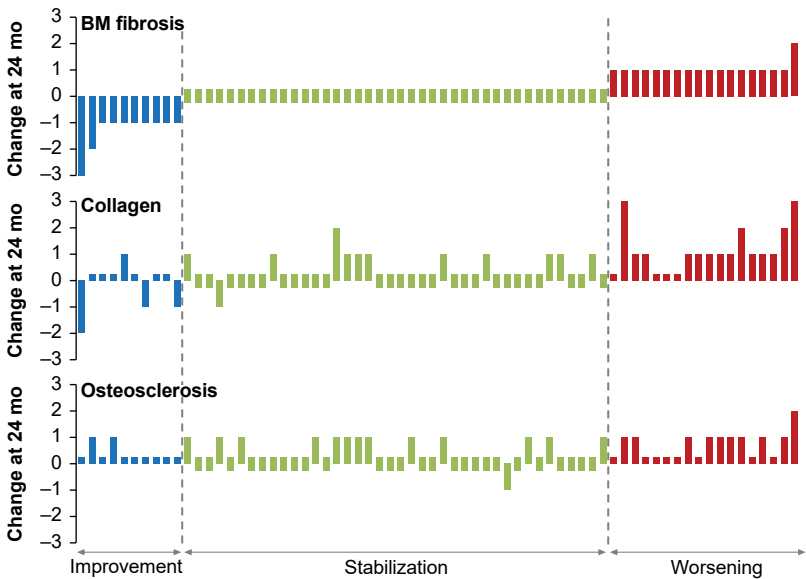

B. 48 Months

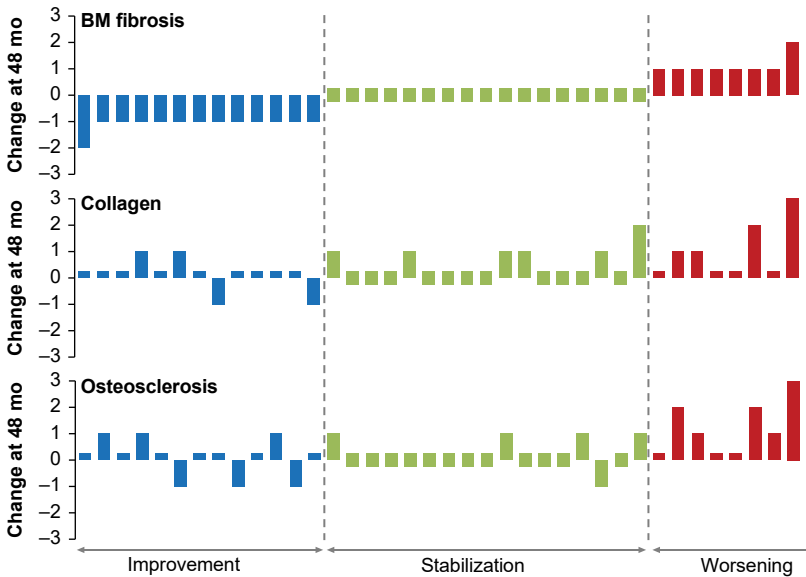

C. 60 Months

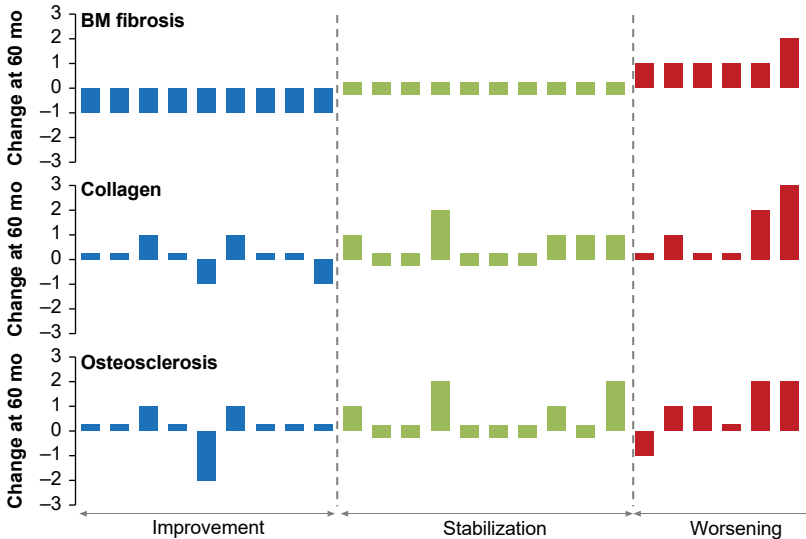

Supplement: MOESM1 [file 15538180]
